# Supplementary material for: Identification of poly(ADP-ribose)polymerase 1 and 2 (PARP1/2) as targets of andrographolide using an integrated chemical biology approach
Source: Royal Society of Chemistry journal article supplement (doi:10.1039/d1cc02272e), 2021-01-01
Supplement: d1cc02272e1.xlsx [file d1cc02272e1.xlsx]

## Sheet: CC
Block	Column	Row	Name	ID	SNR
14	3	75	PCCA	JHU03995.B14C3R75	8.94725
12	24	37	PC	JHU14030.B12C24R37	7.9022
8	9	67	LZIC	JHU10127.B8C9R67	6.15345
4	29	85	KCNAB1	JHU05510.B4C29R85	5.84041
9	28	33	KCNAB1	JHU13741.B9C28R33	5.65201
1	14	53	PRRC2B	JHU03219.B1C14R53	5.53001
6	16	19	KCNAB2	JHU07150.B6C16R19	4.90348
6	2	47	MCCC1	JHU08487.B6C2R47	4.69741
20	15	7	ACACB	JHU25646.B20C15R7	4.59985
9	18	33	F2	JHU13729.B9C18R33	4.54652
13	9	43	MAGEA9	JHU18292.B13C9R43	4.45249
3	2	43	HMBS	JHU02731.B3C2R43	4.39005
7	2	75	HLCS	JHU10397.B7C2R75	4.21277
10	3	33	HMBS	JHU13446.B10C3R33	4.01482
3	3	55	SEC13	JHU03536.B3C3R55	3.92498
7	2	9	MAGEC2	JHU06193.B7C2R9	3.89383
19	16	29	GSDMA	JHU29762.B19C16R29	3.78001
12	20	19	C1orf94	JHU12642.B12C20R19	3.71395
12	18	51	SYTL2	JHU14888.B12C18R51	3.66978
7	2	7	CNOT8	JHU06166.B7C2R7	3.64623
6	13	85	ARMC6	JHU11424.B6C13R85	3.38668
15	8	43	MAGEA1	JHU18291.B15C8R43	3.31982
9	23	31	C1orf94	JHU13411.B9C23R31	3.31166
6	7	49	SF3B4	JHU09195.B6C7R49	3.2849
9	29	59	KLHL14	JHU15051.B9C29R59	3.2833
16	1	73	MATN4	JHU19310.B16C1R73	3.25575
14	14	9	EID1	JHU02047.B14C14R9	3.25108
10	17	77	CRYZ	JHU16173.B10C17R77	3.24849
8	27	67	WDR55	JHU10168.B8C27R67	3.21871
18	9	1	TTC39A	JHU24665.B18C9R1	3.21061
10	27	39	TP53	JHU13973.B10C27R39	3.20517
10	15	87	SACM1L	JHU04011.B10C15R87	3.17335
11	27	71	DCAF8	JHU15856.B11C27R71	3.17182
10	29	49	ASAP2	JHU14635.B10C29R49	3.15432
11	3	77	SPP1	JHU16134.B11C3R77	3.13346
6	2	87	KCNAB1	JHU11182.B6C2R87	3.12776
7	22	19	NFKB1	JHU07070.B7C22R19	3.11754
7	9	41	ZADH2	JHU08252.B7C9R41	3.10575
15	15	37	STK39	JHU17319.B15C15R37	3.10304
12	12	83	FAM131B	JHU16409.B12C12R83	3.10054
1	7	89	FAM131C	JHU05680.B1C7R89	3.09732
7	23	1	ANKS1A_frag	JHU05763.B7C23R1	3.09678
3	32	57	TMEM263	JHU03555.B3C32R57	3.08746
13	23	73	CPEB3	JHU12849.B13C23R73	3.08739
9	15	31	CRYM	JHU13426.B9C15R31	3.08329
8	9	73	DHX32	JHU10488.B8C9R73	3.06285
8	10	79	RRAGD	JHU11116.B8C10R79	3.04628
4	1	89	FAM131B	JHU05594.B4C1R89	3.03335
16	18	47	KJ902540	JHU18464.B16C18R47	3.01704
9	4	77	SPCS2	JHU16328.B9C4R77	3.00606
9	23	41	NUPL2	JHU13836.B9C23R41	3.00483
18	24	1	UBE2Q1	JHU25696.B18C24R1	2.99423
9	22	19	CAMKK2	JHU12742.B9C22R19	2.99395
4	21	41	AHSA1	JHU02594.B4C21R41	2.98975
7	3	61	NAT6	JHU09659.B7C3R61	2.97285
10	27	13	GPR85	JHU12386.B10C27R13	2.96633
5	13	59	ELN	JHU09530.B5C13R59	2.96415
20	21	17	CPEB3	JHU23980.B20C21R17	2.96319
6	24	11	C17orf75	JHU06343.B6C24R11	2.95745
7	22	51	MAGEA9	JHU08970.B7C22R51	2.94653
15	25	69	CAPN2	JHU00303.B15C25R69	2.94546
11	9	43	CPNE6	JHU14289.B11C9R43	2.93545
3	20	45	MAGEA8	JHU02742.B3C20R45	2.9181
12	6	39	ZDHHC1	JHU14070.B12C6R39	2.91675
16	8	11	C10orf35	JHU01268.B16C8R11	2.91331
7	4	59	GPS1	JHU09442.B7C4R59	2.90464
4	18	89	SUCLG2	JHU05748.B4C18R89	2.88514
20	27	7	SHC1	JHU27398.B20C27R7	2.8816
11	14	43	SNX9	JHU14342.B11C14R43	2.87924
7	15	55	APPL2	JHU09225.B7C15R55	2.87559
6	10	31	EPB41	JHU07994.B6C10R31	2.87169
18	30	35	AIM1L	JHU30312.B18C30R35	2.87053
11	1	35	PRMT2	JHU13656.B11C1R35	2.84153
12	3	47	GDAP2	JHU14202.B12C3R47	2.82153
9	17	85	FAM29A	JHU08382.B9C17R85	2.81648
12	19	65	MIPOL1	JHU15537.B12C19R65	2.81414
10	8	15	FAM131B	JHU12373.B10C8R15	2.81057
13	30	75	CIAO1	JHU00307.B13C30R75	2.80881
11	8	65	UNC45A	JHU15469.B11C8R65	2.80037
8	6	21	MAPK10	JHU07156.B8C6R21	2.78385
10	5	33	CENPP	JHU13422.B10C5R33	2.78114
11	8	67	BC101016_frag	JHU15776.B11C8R67	2.777
10	7	31	PSMC3	JHU13762.B10C7R31	2.77428
12	13	15	NCLN	JHU12596.B12C13R15	2.77387
12	6	31	ISM2	JHU13679.B12C6R31	2.77203
4	4	67	PDCL	JHU04462.B4C4R67	2.7622
14	19	9	USP4	JHU09017.B14C19R9	2.75523
9	13	71	COL5A2	JHU15971.B9C13R71	2.74221
15	5	43	HSD17B4	JHU18191.B15C5R43	2.73898
12	10	27	C16orf73	JHU13318.B12C10R27	2.7352
19	31	33	APBA2	JHU30292.B19C31R33	2.73444
18	29	25	SETD7	JHU29696.B18C29R25	2.73377
5	29	81	AC018359.1_frag	JHU10942.B5C29R81	2.73249
5	24	23	PSMD2	JHU07165.B5C24R23	2.73175
17	11	17	USP13	JHU21064.B17C11R17	2.72914
9	10	15	TBC1D9B	JHU12621.B9C10R15	2.72718
11	9	61	DNAJA4	JHU15406.B11C9R61	2.72435
15	26	5	Pdc	JHU19591.B15C26R5	2.7109
14	26	41	CASK	JHU17128.B14C26R41	2.70831
5	27	21	HOOK3	JHU07044.B5C27R21	2.70532
18	27	3	RAD52	JHU24692.B18C27R3	2.70217
4	6	43	YKT6	JHU02973.B4C6R43	2.69645
6	15	17	CAMKV	JHU06536.B6C15R17	2.69047
5	21	89	PPP6R2	JHU11491.B5C21R89	2.68689
12	18	39	TXNDC12	JHU14163.B12C18R39	2.67326
1	8	37	NAT9	JHU02457.B1C8R37	2.66161
8	32	69	TTC27	JHU10166.B8C32R69	2.65995
14	11	11	NDUFAF5_frag	JHU09420.B14C11R11	2.65575
15	26	41	MARK4	JHU17311.B15C26R41	2.65052
11	4	7	ITPKB	JHU12104.B11C4R7	2.64982
17	25	21	TACC3	JHU29447.B17C25R21	2.64816
10	4	31	SCG3	JHU13667.B10C4R31	2.64204
11	20	51	HSFY1	JHU14555.B11C20R51	2.63542
9	32	41	OLFML3	JHU13954.B9C32R41	2.62117
14	28	83	SP100	JHU03441.B14C28R83	2.62074
11	25	89	MAPK8IP2	JHU14022.B11C25R89	2.61969
15	24	19	KDM6A	JHU19204.B15C24R19	2.61901
18	28	3	CBWD3	JHU25721.B18C28R3	2.61629
6	27	23	VWA5A	JHU07054.B6C27R23	2.61234
12	14	89	ADH5	JHU04710.B12C14R89	2.612
10	10	17	BRAT1	JHU12557.B10C10R17	2.59187
13	20	59	GDPGP1	JHU17424.B13C20R59	2.5909
11	6	39	ARHGEF1	JHU13985.B11C6R39	2.58936
10	6	37	MORC2	JHU14024.B10C6R37	2.58661
14	30	71	SH2B1	JHU01222.B14C30R71	2.58523
14	29	61	USP7	JHU17961.B14C29R61	2.58213
14	14	77	GGA3	JHU16186.B14C14R77	2.57615
14	17	81	KRT18P55	JHU10502.B14C17R81	2.57174
3	28	51	C11orf45	JHU03369.B3C28R51	2.56895
11	24	51	KBTBD12	JHU14758.B11C24R51	2.56727
5	7	59	EXOC3	JHU09531.B5C7R59	2.56575
11	16	67	RNF220	JHU15874.B11C16R67	2.56032
12	30	75	SUCLG2	JHU16378.B12C30R75	2.56009
11	7	71	IGHG1	JHU15996.B11C7R71	2.55812
4	18	13	RTN3	JHU01122.B4C18R13	2.54958
10	18	29	MRM1	JHU13357.B10C18R29	2.54858
17	26	21	TRAFD1	JHU22846.B17C26R21	2.54808
13	15	31	KJ903784	JHU17062.B13C15R31	2.54756
11	21	57	IGHG1	JHU15224.B11C21R57	2.54464
12	15	53	RFXANK	JHU14589.B12C15R53	2.5438
6	6	11	SCG2	JHU06408.B6C6R11	2.54345
5	27	67	DAB1	JHU10095.B5C27R67	2.54341
10	22	51	HK3	JHU14652.B10C22R51	2.54211
15	12	39	SRMS	JHU17317.B15C12R39	2.54143
15	31	61	APBA1	JHU18056.B15C31R61	2.53878
17	26	23	USP13	JHU22797.B17C26R23	2.53818
11	20	25	OLIG1	JHU13083.B11C20R25	2.53137
8	18	15	CPNE5	JHU06837.B8C18R15	2.53122
14	26	89	LY96	JHU08402.B14C26R89	2.53048
10	19	71	SLC25A30	JHU15937.B10C19R71	2.52669
18	31	11	DNMBP	JHU06935.B18C31R11	2.52627
5	27	57	SEC13	JHU09387.B5C27R57	2.52412
8	16	79	DCK	JHU10963.B8C16R79	2.51713
12	11	71	SZT2	JHU15875.B12C11R71	2.51709
13	31	69	IRAK3	JHU07528.B13C31R69	2.51686
12	6	71	PRMT2	JHU15930.B12C6R71	2.51674
14	26	77	ALDH9A1	JHU13502.B14C26R77	2.50654
4	32	41	TCAP	JHU01625.B4C32R41	2.50553
20	6	25	DAZ3	JHU29752.B20C6R25	2.50467
15	7	43	HSPA1A	JHU18458.B15C7R43	2.49825
6	5	53	BC047522.1_frag	JHU08837.B6C5R53	2.49445
11	20	85	CEP250	JHU02517.B11C20R85	2.49374
15	15	61	CTAG1A	JHU17795.B15C15R61	2.49239
15	28	39	RSPH6A	JHU17380.B15C28R39	2.49039
5	10	11	C6orf141	JHU06448.B5C10R11	2.48881
4	6	39	FAF1	JHU02528.B4C6R39	2.48428
8	11	79	BTRC	JHU10950.B8C11R79	2.48397
8	6	87	PRKAG1	JHU11391.B8C6R87	2.48356
16	4	45	LSS	JHU18380.B16C4R45	2.4828
7	29	17	PELI3	JHU06678.B7C29R17	2.47267
8	6	59	UBR2	JHU09495.B8C6R59	2.47135
10	17	51	DVL3	JHU14639.B10C17R51	2.47104
16	22	81	HVCN1	JHU01298.B16C22R81	2.4665
9	31	69	BC089412.1_frag	JHU15999.B9C31R69	2.46376
10	1	3	INTS3	JHU11748.B10C1R3	2.46124
11	31	89	MAPK8IP2	JHU14022.B11C31R89	2.45918
17	10	31	TH	JHU30247.B17C10R31	2.45909
9	21	25	RUNDC1	JHU13374.B9C21R25	2.45621
12	18	27	C16orf73	JHU13318.B12C18R27	2.45247
16	1	65	ASB15	JHU17968.B16C1R65	2.44801
4	22	67	RBFOX2	JHU04381.B4C22R67	2.44647
5	23	83	ADPRHL1	JHU10752.B5C23R83	2.44555
15	21	67	CUL2	JHU08852.B15C21R67	2.4447
17	30	3	HCN1	JHU25867.B17C30R3	2.44449
9	7	39	STUB1	JHU14160.B9C7R39	2.44398
6	31	81	SPC24	JHU11120.B6C31R81	2.44327
7	16	85	ZW10	JHU11418.B7C16R85	2.4413
18	19	17	PLCD4	JHU23944.B18C19R17	2.44094
5	32	21	COG2	JHU07023.B5C32R21	2.43855
10	24	31	EARS2	JHU13619.B10C24R31	2.43825
13	18	61	NOS1	JHU18111.B13C18R61	2.43714
15	28	13	INTS4	JHU15331.B15C28R13	2.4365
10	5	11	TFAP2D	JHU11977.B10C5R11	2.43568
10	16	31	EXO5	JHU13607.B10C16R31	2.43421
10	15	81	DHFR	JHU16402.B10C15R81	2.43163
10	24	23	FAM129A	JHU12860.B10C24R23	2.43145
10	31	13	ANXA9	JHU12544.B10C31R13	2.42982
12	3	17	RASGRP3	JHU12324.B12C3R17	2.42982
14	30	9	MTERF4	JHU13646.B14C30R9	2.42563
15	3	13	NUP62CL	JHU01883.B15C3R13	2.42084
16	10	5	KJ898030	JHU19826.B16C10R5	2.41996
5	23	13	AAGAB	JHU06550.B5C23R13	2.41886
16	22	45	HSPA6	JHU18279.B16C22R45	2.4165
16	18	67	STAU2	JHU07762.B16C18R67	2.41644
1	14	49	EFHC1	JHU03202.B1C14R49	2.40907
10	26	59	C11orf88	JHU14936.B10C26R59	2.40903
6	3	83	LINC00928_frag	JHU10844.B6C3R83	2.40716
15	30	69	DNAI2	JHU07507.B15C30R69	2.4071
2	24	67	ANKRA2	JHU04417.B2C24R67	2.40645
13	17	43	VILL	JHU18330.B13C17R43	2.40618
16	14	23	F10	JHU19090.B16C14R23	2.41
10	14	67	CCT8L2	JHU15783.B10C14R67	2.40379
13	30	71	TUBB4A	JHU03257.B13C30R71	2.40318
14	15	85	AK5	JHU08451.B14C15R85	2.40224
2	27	19	SPAG16	JHU01330.B2C27R19	2.39616
11	24	37	HOOK1	JHU14013.B11C24R37	2.39313
11	16	41	KBTBD6	JHU14020.B11C16R41	2.39251
10	20	63	VASP	JHU15379.B10C20R63	2.39204
7	32	21	INPP5B	JHU07047.B7C32R21	2.39
4	10	17	ETFA	JHU01084.B4C10R17	2.38214
15	28	67	TAB2	JHU07536.B15C28R67	2.3812
10	30	81	ZC3H14	JHU01822.B10C30R81	2.38064
14	5	47	PDE1B	JHU18211.B14C5R47	2.37851
7	31	27	FAM49B	JHU07326.B7C31R27	2.37786
7	15	9	PCYT2	JHU06207.B7C15R9	2.37614
15	29	73	HSPBAP1	JHU00813.B15C29R73	2.37546
17	19	19	HSP90AA1	JHU29409.B17C19R19	2.37388
18	28	7	HK2	JHU00137.B18C28R7	2.37308
11	1	29	FPGT	JHU13235.B11C1R29	2.37208
1	30	87	POLR2D	JHU05736.B1C30R87	2.37183
19	18	27	APBA3	JHU29862.B19C18R27	2.37121
11	14	17	ANKRD44	JHU12351.B11C14R17	2.37019
6	6	19	RUNDC3B	JHU07169.B6C6R19	2.36763
11	16	25	MAGEA6	JHU13255.B11C16R25	2.36514
15	23	45	OGDH	JHU18208.B15C23R45	2.35982
7	22	71	BSND	JHU10085.B7C22R71	2.35887
19	22	23	SRRT	JHU29258.B19C22R23	2.35787
3	6	53	SNX8	JHU03345.B3C6R53	2.35678
14	28	41	KLHL18	JHU17354.B14C28R41	2.35594
8	24	55	OBFC1	JHU09466.B8C24R55	2.35068
8	15	83	PATL2	JHU10841.B8C15R83	2.34946
7	26	9	SERPINA1	JHU06214.B7C26R9	2.34926
12	13	25	ANKS1B	JHU13311.B12C13R25	2.34582
16	3	79	NAAA	JHU09606.B16C3R79	2.34147
14	14	45	PARP1	JHU18304.B14C14R45	2.34145
14	27	13	PLA2G6	JHU06889.B14C27R13	2.34056
11	27	73	KIZ	JHU16162.B11C27R73	2.33984
6	14	85	UBE3A	JHU11313.B6C14R85	2.33548
13	24	45	CD34	JHU18343.B13C24R45	2.32975
13	25	9	TSPYL6	JHU10165.B13C25R9	2.32959
3	25	87	USP2	JHU05656.B3C25R87	2.32648
9	14	75	TESPA1	JHU16200.B9C14R75	2.32629
8	4	57	ZNF232	JHU09500.B8C4R57	2.32403
6	30	55	LRBA_frag	JHU09554.B6C30R55	2.32275
1	15	47	IST1	JHU02737.B1C15R47	2.32202
7	12	17	BRD9	JHU06530.B7C12R17	2.32196
9	27	73	NAPB	JHU16213.B9C27R73	2.32151
3	7	57	UBE2E2	JHU03834.B3C7R57	2.32101
5	24	79	RBBP7	JHU11013.B5C24R79	2.3207
1	24	15	SSBP2	JHU01049.B1C24R15	2.32064
17	31	17	KDM3A	JHU25882.B17C31R17	2.31979
11	2	87	PHGDH	JHU02559.B11C2R87	2.31896
20	17	23	RBMS3	JHU29173.B20C17R23	2.31765
5	8	23	FOXP4	JHU07036.B5C8R23	2.31382
9	14	67	USP17L22_frag	JHU15809.B9C14R67	2.31261
9	31	79	MDFI	JHU02061.B9C31R79	2.30871
1	17	55	PHB2	JHU03612.B1C17R55	2.30545
6	23	5	SLA2	JHU05823.B6C23R5	2.30501
7	9	87	NEDD8	JHU11289.B7C9R87	2.30368
4	16	49	NDUFS1	JHU03326.B4C16R49	2.30101
11	22	15	TOMM40	JHU12431.B11C22R15	2.2989
11	25	11	BCL6	JHU12067.B11C25R11	2.29843
10	7	71	IGHG1	JHU15997.B10C7R71	2.29739
2	6	59	SDHAF2	JHU03656.B2C6R59	2.29737
14	13	79	KLHL22	JHU03506.B14C13R79	2.29691
